# Supplementary material for: Fractional spinal anesthesia and systemic hemodynamics in frail elderly hip fracture patients
Source: Research Square preprint supplement (doi:10.21203/rs.3.rs-1053831/v1), 2021-11-11
Supplement: Supplementary file 1 [file 39217071fe1227121029120f.pdf]

Table 1 Demographic data

|                                             | Overall<br>(N=15) |
|---------------------------------------------|-------------------|
| <b>Gender, n (%)</b>                        |                   |
| Female                                      | 12 (80%)          |
| Male                                        | 3 (20%)           |
| <b>Age, (y)</b>                             | 89 (69-94)        |
| <b>ASA, n (%)</b>                           |                   |
| 2                                           | 4 (27%)           |
| 3                                           | 10 (67%)          |
| 4                                           | 1 (7%)            |
| <b>NHFS, n (%)</b>                          |                   |
| 4                                           | 6 (40%)           |
| 5                                           | 3 (20%)           |
| 6                                           | 4 (27%)           |
| 7                                           | 2 (13%)           |
| <b>Body mass index (kg/m<sup>2</sup>)</b>   | 22.0 (3.71)       |
| <b>Body surface area (m<sup>2</sup>)</b>    | 1.64 (0.133)      |
| <b>Serum haemoglobin (g/L)</b>              | 113 (20.4)        |
| <b>Previous myocardial infarction n (%)</b> | 2(13%)            |
| <b>Hypertension n (%)</b>                   | 11 (73%)          |
| <b>COPD n (%)</b>                           | 5(33%)            |
| <b>Dementia n (%)</b>                       | 7(47%)            |
| <b>Malignancy n (%)</b>                     | 5(33%)            |

ASA: American Society of Anesthesiologists risk score, NHFS: Nottingham Hip Fracture Score, COPD; chronic obstructive pulmonary disease. Values are mean  $\pm$ SD, Age is median (range).
